# Supplementary material for: FeRu-based metal–organic framework bifunctional catalysts for hydrogen production and methanol electroreforming
Source: Royal Society of Chemistry journal article supplement (doi:10.1039/d2ta07427c), 2023-01-01
Supplement: d2ta07427c1.pdf [file d2ta07427c1.pdf]

## Supporting Information

### Computational Details

The density functional theory as implemented using the Vienna *ab initio* simulation package (VASP, Version: 5.4.4)<sup>1</sup>. The exchange–correlation potential was based on the Perdew–Burke–Ernzerhof (PBE) functional by using the projected augmented wave (PAW) method with the generalized gradient approximation (GGA)<sup>2</sup>. The energy cutoff was set as 520 eV. All the positions of atoms were fully relaxed until the forces on each atom were less than 0.01 eV Å<sup>-1</sup>. The  $2 \times 2 \times 1$  *k*-mesh were used to integrate the Brillouin zones for the surface (supercell) slab model (Monkhorst–Pack algorithm). The DFT+U method was used where mentioned. The Hubbard U is applied to the Fe-d orbitals (U=5.3 eV). The van der Waals interactions were described via the DFT-D3 method proposed by Grimme<sup>3</sup>, which has been shown to accurately describe the chemisorption and physisorption properties of layered materials. The periodic replicas were decoupled in a vacuum region of about 20 Å.

Following Nørskov's strategy<sup>4, 5</sup>, the binding energies of OCH<sub>3</sub>, OCH<sub>2</sub>OH, HCOO are calculated through

$$\Delta E(\text{OCH}_3) = E(\text{sub/OCH}_3) - [E(\text{sub}) + E(\text{CH}_3\text{OH}) - E(\text{H}_2)/2]$$

$$\Delta E(\text{OCH}_2\text{OH}) = E(\text{sub/OCH}_2\text{OH}) - [E(\text{sub}) + E(\text{HOCH}_2\text{OH}) - E(\text{H}_2)/2]$$

$$\Delta E(\text{HCOO}) = E(\text{sub/HCOO}) - [E(\text{sub}) + E(\text{HCOOH}) - E(\text{H}_2)/2]$$

where  $E(\text{sub/OCH}_3)$ ,  $E(\text{sub/OCH}_2\text{OH})$  and  $E(\text{sub/HCOO})$  are the total energies of OCH<sub>3</sub>, OCH<sub>2</sub>OH and HCOO groups on the substrate, respectively;  $\Delta E(\text{sub})$ ,  $E(\text{CH}_3\text{OH})$ ,  $E(\text{HOCH}_2\text{OH})$ ,  $E(\text{HCOOH})$  and  $E(\text{H}_2)$  denote the total energies of bare substrate, CH<sub>3</sub>OH, HOCH<sub>2</sub>OH, HCOOH and gas H<sub>2</sub>, respectively.

The adsorption energies for CH<sub>3</sub>OH, HCOOH and HCOOOH on the substrate were

described as:

$$\Delta E(\text{CH}_3\text{OH}) = E(\text{sub}/\text{CH}_3\text{OH}) - [E(\text{sub}) + E(\text{CH}_3\text{OH})]$$

$$\Delta E(\text{HCOOH}) = E(\text{sub}/\text{HCOOH}) - [E(\text{sub}) + E(\text{HCOOH})]$$

$$\Delta E(\text{HCOOOH}) = E(\text{sub}/\text{HCOOOH}) - [E(\text{sub}) + E(\text{H}_2\text{CO}_3)]$$

Where  $E(\text{sub}/\text{CH}_3\text{OH})$ ,  $E(\text{HCOOH})$  and  $E(\text{sub}/\text{HCOOOH})$  are the total energies of  $\text{CH}_3\text{OH}$ ,  $\text{HCOOH}$  and  $\text{HCOOOH}$  groups on the substrate, respectively;  $E(\text{sub})$ ,  $E(\text{CH}_3\text{OH})$ ,  $E(\text{HCOOH})$  and  $E(\text{sub}/\text{H}_2\text{CO}_3)$  denote the total energies of the substrate,  $\text{CH}_3\text{OH}$ ,  $\text{HCOOH}$  and  $\text{H}_2\text{CO}_3$ , respectively.

For gas-phase species, the standard ideal-gas method was used to calculate the free energy. Computational hydrogen electrode (CHE) model was used to calculate the Gibbs free energy change of the elementary reactions<sup>6</sup>. At electrode potential  $U = 0$  V (vs. reversible hydrogen electrode), the free energy can be calculated by  $\Delta G = \Delta E - T\Delta S + \Delta \text{ZPE}$ .  $\Delta E$  is reaction energy of hydrogenation.  $T\Delta S$  is the gas-phase entropy contribution at 298 K.  $\Delta \text{ZPE}$  is the zero-point energy correction.

## Figures

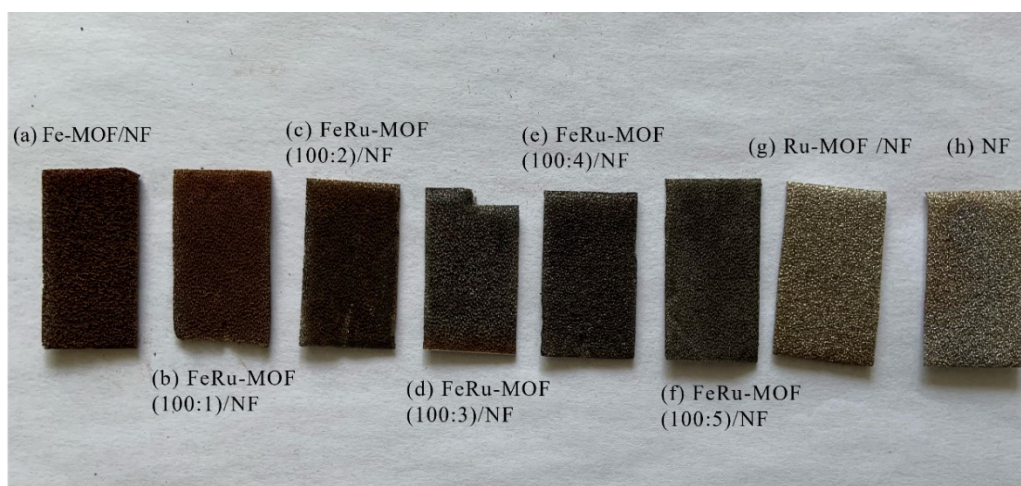

**Figure S1.** The photograph of (a) Fe-MOF/NF, (b) FeRu-MOF (100:1)/NF, (c) FeRu-MOF (100:2)/NF, (d) FeRu-MOF (100:3)/NF, (e) FeRu-MOF (100:4)/NF, (f) FeRu-MOF (100:5)/NF, (g) Ru-MOF/NF and (h) NF.

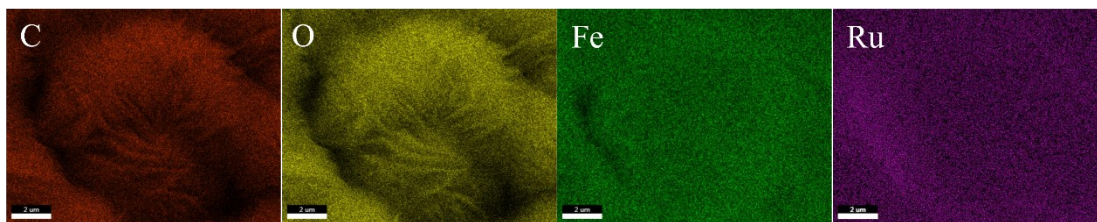

**Figure S2.** Area SEM-EDX elemental mapping images for C, O, Fe, and Ru of FeRu-MOF (100:3)/NF.

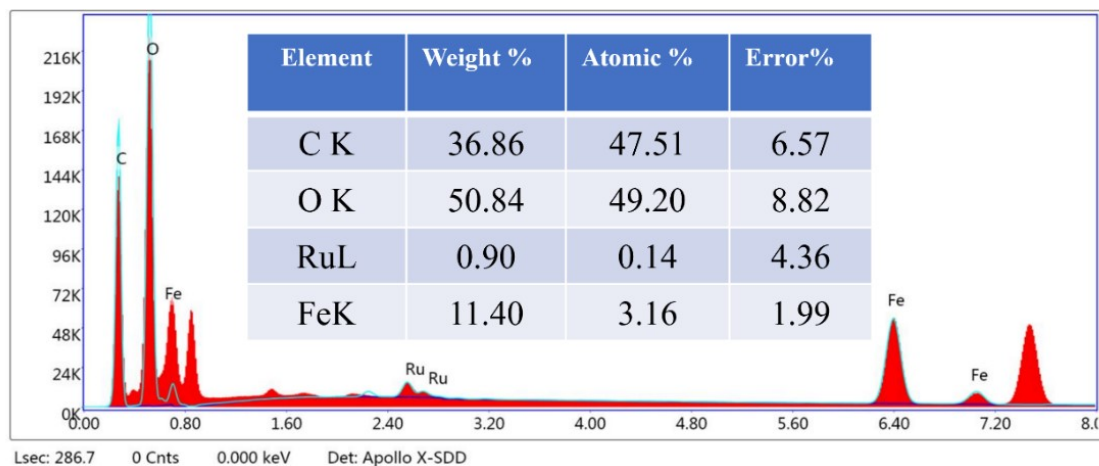

**Figure S3.** EDX spectrum of FeRu-MOF (100:3)/NF nanosheets.

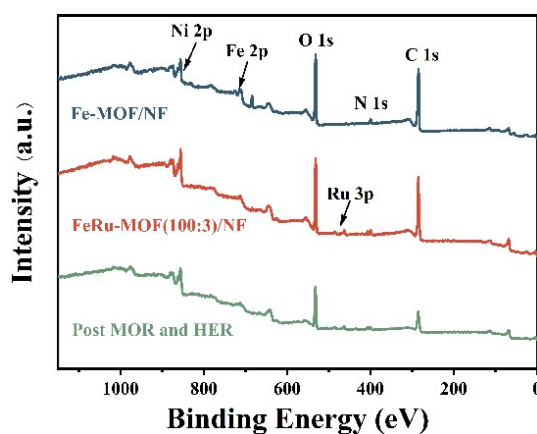

**Figure S4.** The XPS survey spectrum of the Fe-MOF, FeRu-MOF (100:3) and post MOR and HER FeRu-MOF (100:3) nanosheets.

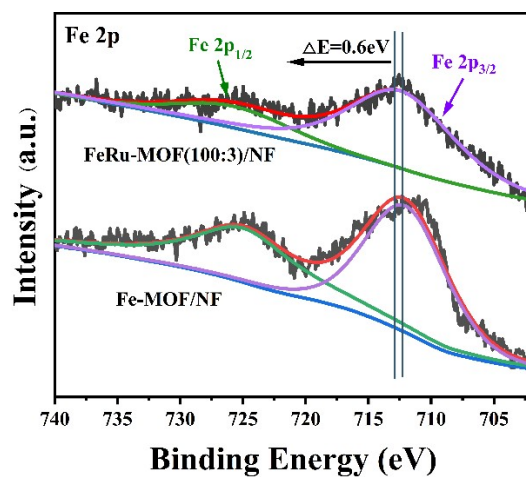

**Figure S5.** High-resolution Fe 2p XPS spectra of Fe-MOF nanosheets and FeRu-MOF (100:3) nanosheets.

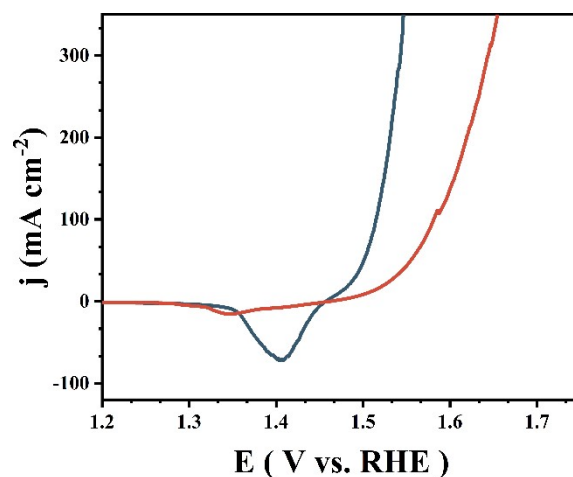

**Figure S6.** LSV curves for Fe-MOF/NF and FeRu-MOF (100:3)/NF in 1.0 M KOH solution.

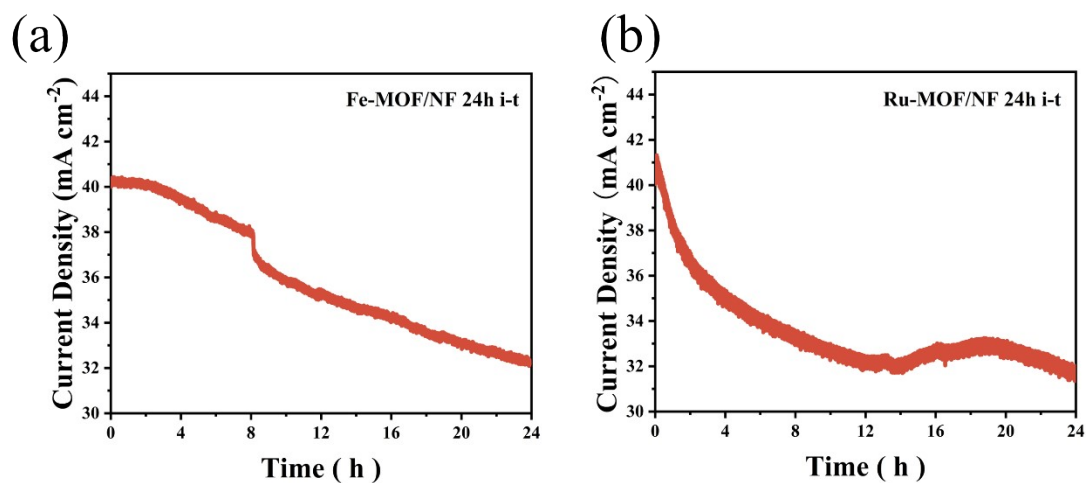

**Figure S7.** The chronoamperometric i-t curve of Fe-MOF /NF and Ru-MOF/NF at

40 mA cm<sup>-2</sup> for 24h.

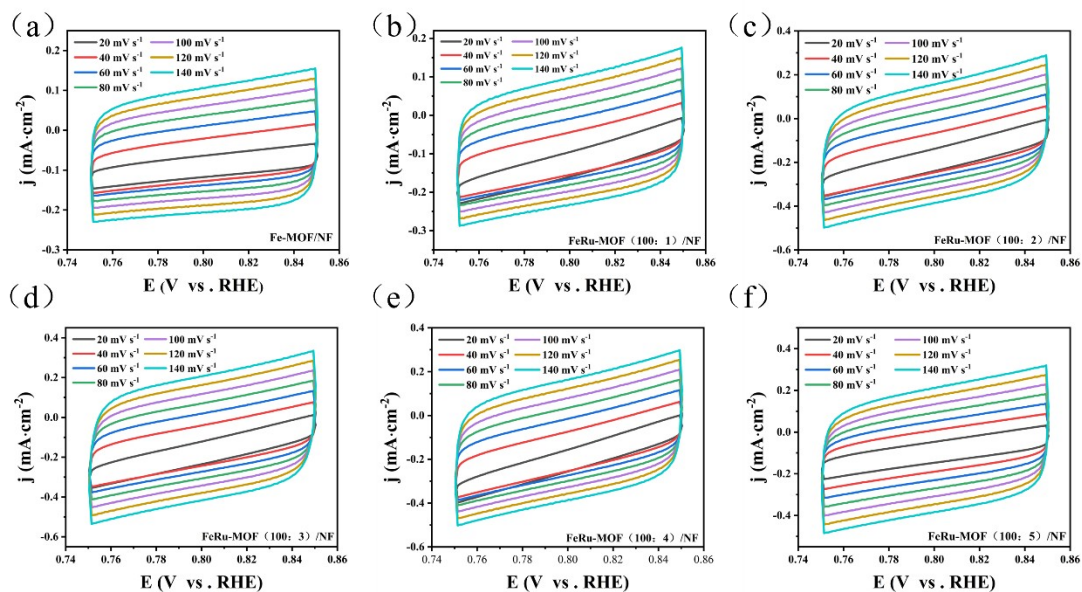

**Figure S8.** Electrochemical double-layer capacitance measurements of (a) Fe-MOF/NF, (b) FeRu-MOF (100:1)/NF, (c) FeRu-MOF (100:2)/NF, (d) FeRu-MOF (100:3)/NF, (e) FeRu-MOF (100:4)/NF and (f) FeRu-MOF (100:5)/NF at scan rates of 20, 40, 60, 80, 100, 120 and 140 mV s<sup>-1</sup>.

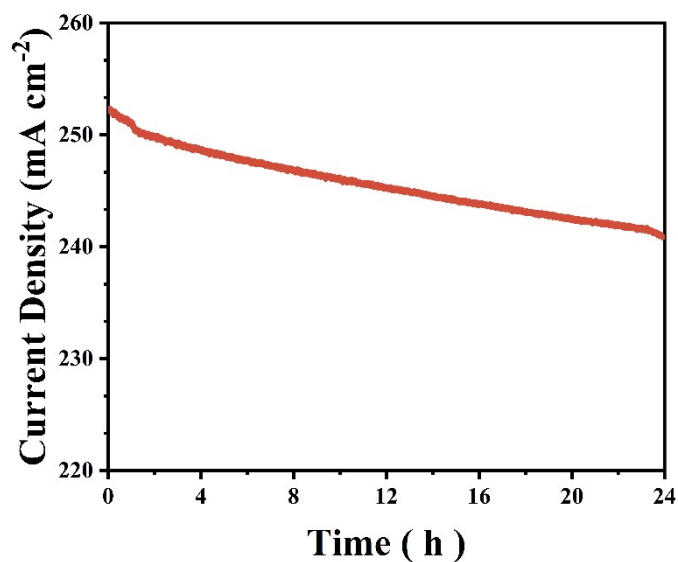

**Figure S9.** The chronoamperometric i-t curve of FeRu-MOF (100:3)/NF||FeRu-MOF (100:3)/NF couple at 250 mA cm<sup>-2</sup> for 24h.

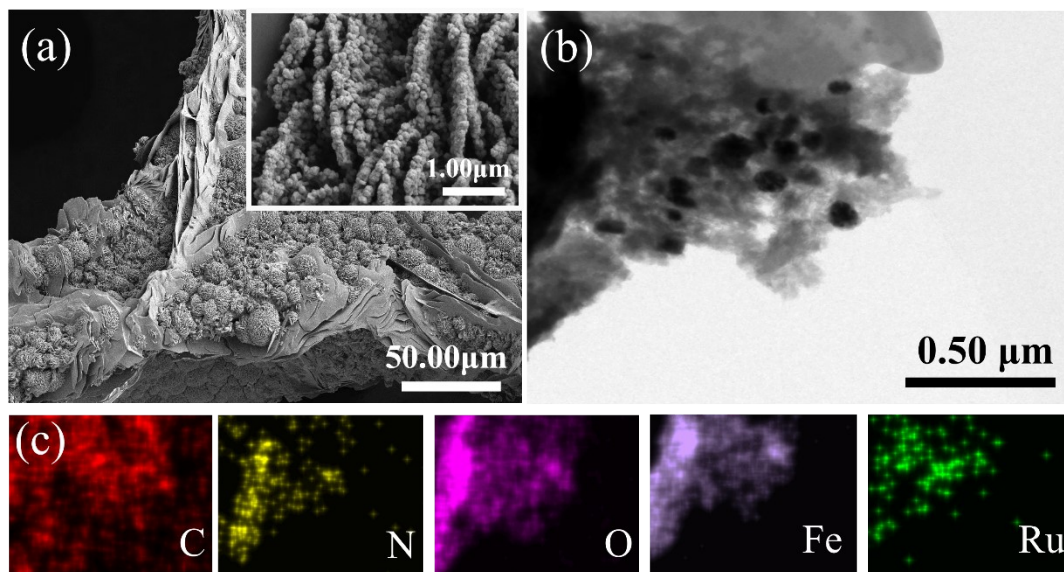

**Figure S10.** (a) SEM image of the post-MOR and HER FeRu-MOF (100:3)/NF. (b) TEM image and (c) elemental mapping images of the post-MOR and HER FeRu-MOF (100:3)/NF nanosheets.

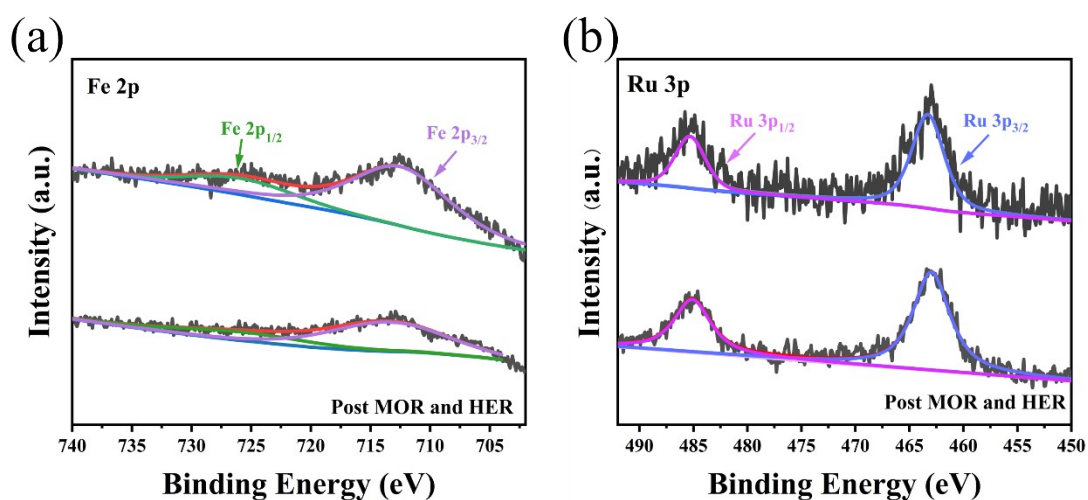

**Figure S11.** High-resolution (a) Fe 2p and (b) Ru 3p XPS spectra of post-MOR and HER FeRu-MOF nanosheets.

## References

1. Kresse and Furthmuller, *Phys. rev.. B, Condens. matter*, 1996, **54**, 11169-11186.
2. Perdew, Burke and Ernzerhof, *Phys. Rev. Lett.*, 1996, **77**, 3865-3868.
3. S. Grimme, *J. Comput. Chem.*, 2006, **27**, 1787-1799.
4. J. Rossmeisl, A. Logadottir and J. K. Nørskov, *Chem. Phys.*, 2005, **319**, 178-184.
5. Z. W. Seh, J. Kibsgaard, C. F. Dickens, I. B. Chorkendorff, J. K. Nørskov and T.

F. Jaramillo, *Science*, 2017, **355**.

6. V. Tripkovic, E. Skulason, S. Siahrostami, J. K. Norskov and J. Rossmeisl, *Electrochim. Acta*, 2010, **55**, 7975-7981.
